# Supplementary material for: Gbx2 Identifies Two Amacrine Cell Subtypes with Distinct Molecular, Morphological, and Physiological Properties
Source: PubMed Central journal article supplement — Cell Rep. Author manuscript; Available in PMC 2020 Dec 3. (PMC7713908; doi:10.1016/j.celrep.2020.108382), 2020-11-17
Supplement: NIHMS1647628-supplement-1.pdf [file NIHMS1647628-supplement-1.pdf]

**Cell Reports, Volume 33**

**Supplemental Information**

**Gbx2 Identifies Two Amacrine Cell Subtypes  
with Distinct Molecular, Morphological,  
and Physiological Properties**

**Patrick C. Kerstein, Joseph Leffler, Benjamin Sivy, W. Rowland Taylor, and Kevin M. Wright**

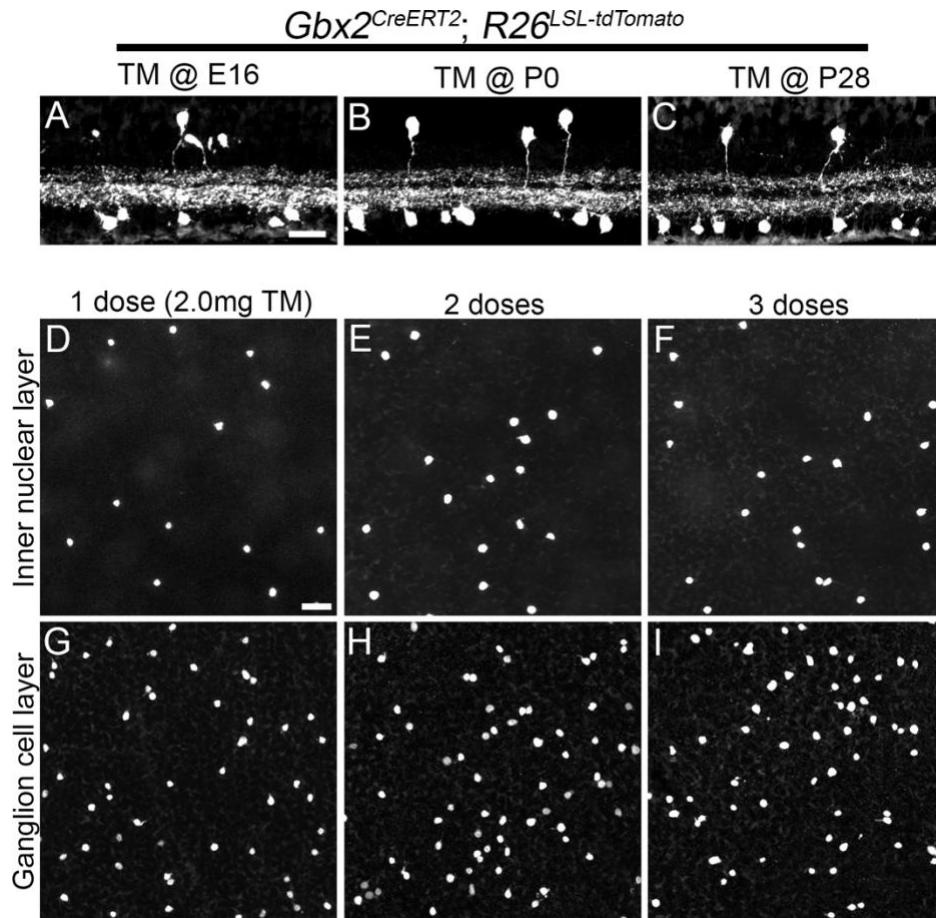

**Figure S1. *Gbx2*<sup>CreERT2-IRES-EGFP</sup> expression is consistent throughout the mouse development and adulthood. Related to Figure 1.**  
**(A-C)** Adult (P35) Retinal cross-sections from *Gbx2*<sup>CreERT2-IRES-EGFP</sup>; *R26*<sup>LSL-tdTomato</sup> mice dosed with of Tamoxifen (60mg/kg) at **(A)** E16, **(B)** P0, **(C)** P28. **(D-I)** Z-projections through the cell bodies of the inner nuclear layer **(D-F)** and ganglion cell layer **(G-I)** from retinal flatmounts of *Gbx2*<sup>CreERT2-IRES-EGFP</sup>; *R26*<sup>LSL-tdTomato</sup> mice administered 2.0mg/day tamoxifen for **(D, G)** 1 day (dose), **(E, H)** 2 days, **(F-I)** 3 days. Scale bar, 25µm in **(A)** and **(D)**.

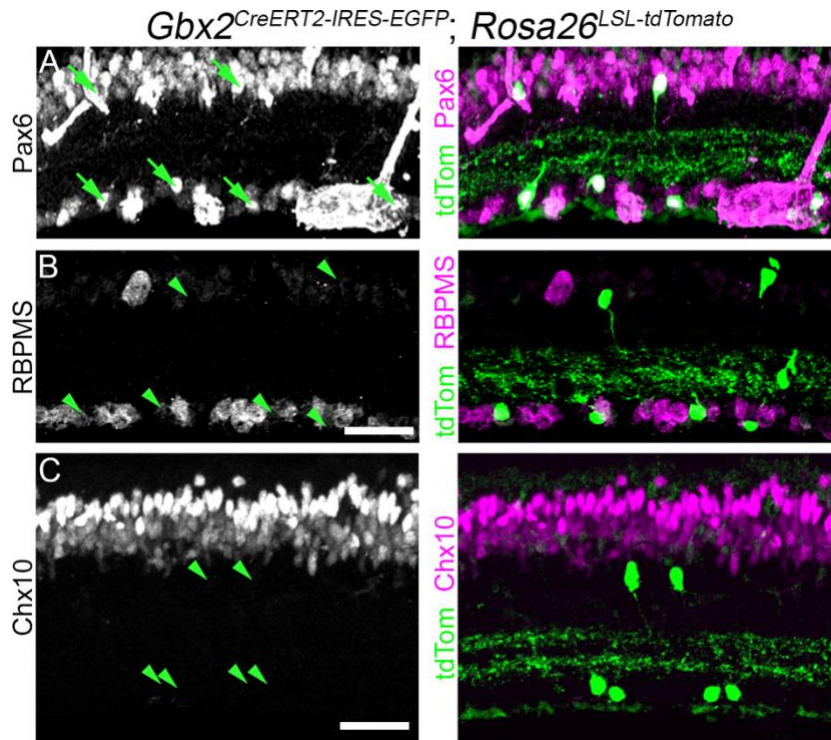

**Figure S2. *Gbx2*+ retinal neurons are amacrine cells. Related to Figure 1.**

Cross-sections of an adult retina from a *Gbx2*<sup>CreERT2-IRES-EGFP</sup>; *Rosa26*<sup>LSL-tdTomato</sup> mouse labeling the total *Gbx2*+ AC population. Left: Neurotransmitter markers, (A) Pax6, (B) RBPMS, and (C) Chx10, label amacrine cells, retinal ganglion cells, and bipolar cells in the inner nuclear layer and ganglion cell layer, respectively. Right: Merged images showing both the select neurotransmitter marker (magenta) and *Gbx2*+ ACs (green). Arrows denote colocalization between the cell marker and *Gbx2*+ ACs, and arrowheads denote *Gbx2*+ ACs that do not colocalize with the specific cell marker. Scale bar, 25  $\mu\text{m}$ .

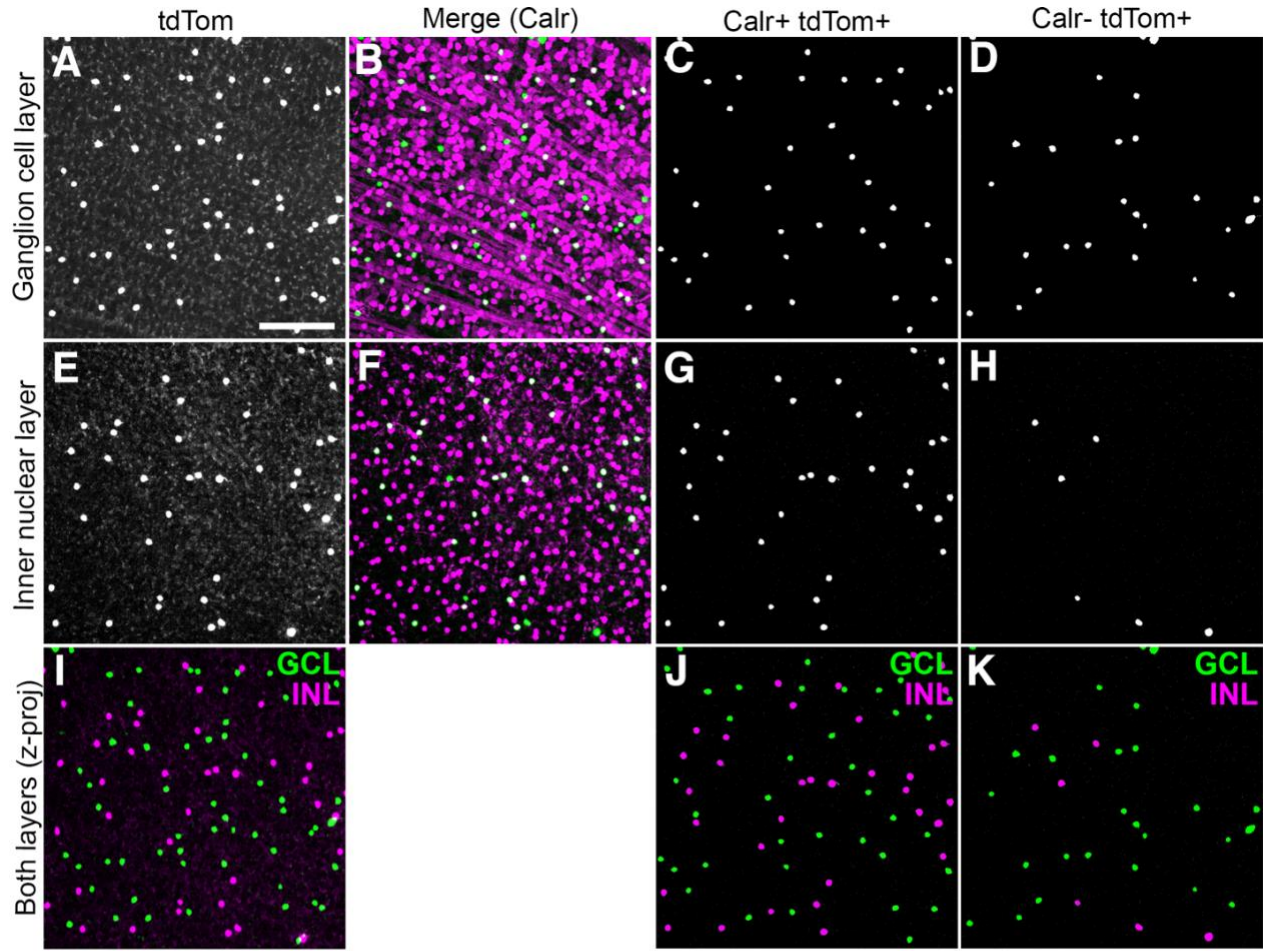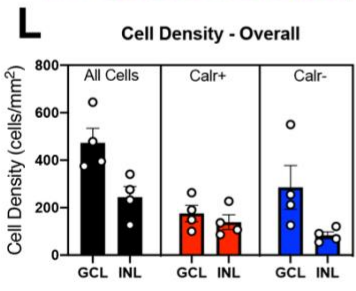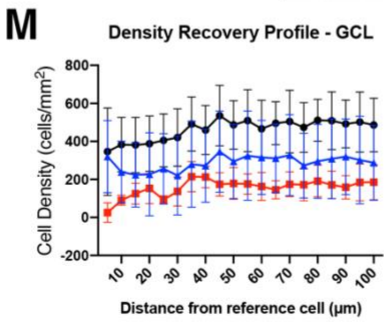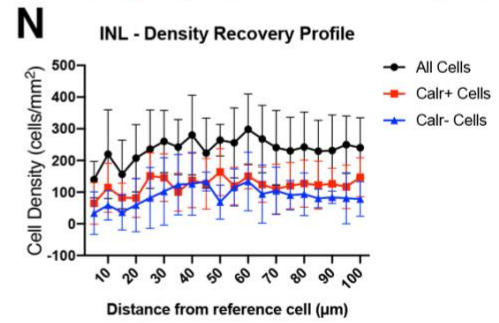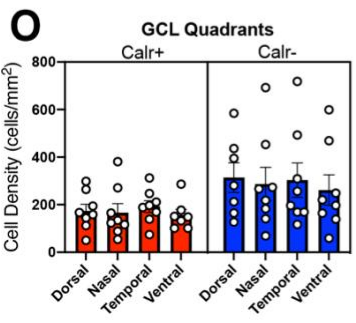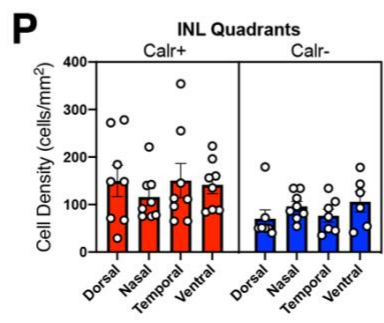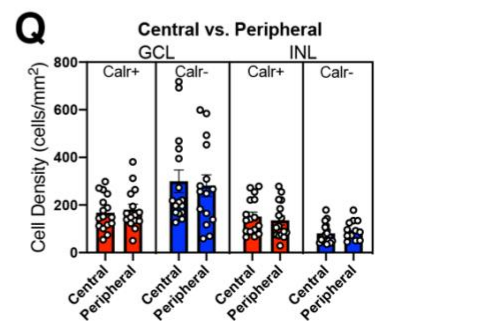

**Figure S3. Gbx2+ AC subpopulations have consistent density and spacing across the retina. Related to Figure 1. (A)** TdTomato expressing Gbx2+ ACs in the ganglion cell layer (GCL) in a retina flatmount from a *Gbx2<sup>CreER</sup>; R26<sup>LSL-tdTomato</sup>* mouse. **(B)** Gbx2+ ACs (green) immunolabeled for calretinin (Calr, magenta) in the GCL. **(C-D)** Masked image of cell bodies of Gbx2+ neurons **(C)** Calretinin+ and **(D)** Calretinin- from the image in **(B)**. **(E)** TdTomato expressing Gbx2+ ACs in the inner nuclear layer (INL). **(F)** Gbx2+ ACs (green) immunolabeled for calretinin (magenta) in the INL. **(G-H)** Masked image of cell bodies of Gbx2+ neurons **(G)** Calr+ and **(H)** Calr- from the image in **(F)**. **(I-K)** Z-projection through the GCL and INL (pseudocolored green and magenta, respectively) for **(I)** all Gbx2+ ACs, **(J)** Calr+ Gbx2+ ACs, and **(K)** Calr- Gbx2+ ACs. **(L)** Quantification of the cell density of Calr+ and Calr- Gbx2+ ACs in the GCL and INL (n= 24 measurements from 4 mice). **(M-N)** The density recovery profile (DRP) of Calr+ and Calr- Gbx2 ACs in the **(M)** GCL and **(N)** INL (n= 32 measurements from 4 mice, respectively). **(O-Q)** The cell densities in the four quadrants of the retina of Gbx2+ AC in the **(O)** GCL and **(P)** INL (n= 32 measurements from 4 mice, respectively). **(Q)** The cell density of Gbx2+ AC populations in the central and peripheral retina (n= 32 measurements from 4 mice, respectively). Data represented as mean  $\pm$  SEM. Scale bar, 50  $\mu$ m in **(A)**.

***Gbx2*<sup>CreERT2-ires-EGFP</sup>; *Rosa26*<sup>LSL-tdTomato</sup>**

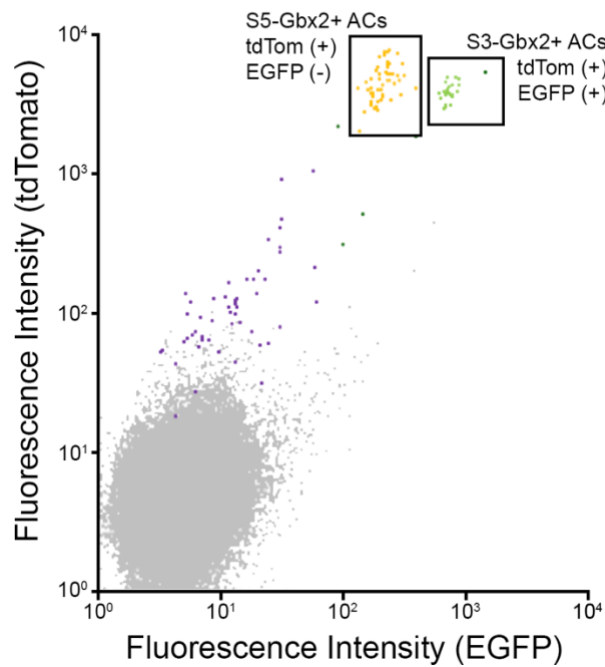

**Figure S4. Flow cytometry plot of dissociated retinal neurons isolated from a *Gbx2*<sup>CreERT2-IRES-EGFP</sup>; *Rosa26*<sup>LSL-tdTomato</sup> mouse. Related to Figure 2.**

Using fluorescence-activated cell sorting, *Gbx2*+ ACs (tdTomato+) from P8 retina were isolated and separated into the S5-*Gbx2*+ ACs (tdTomato+, EGFP<sup>low</sup>) and the S3-*Gbx2*+ ACs (tdTomato+, EGFP<sup>high</sup>) groups for bulk RNA sequencing.

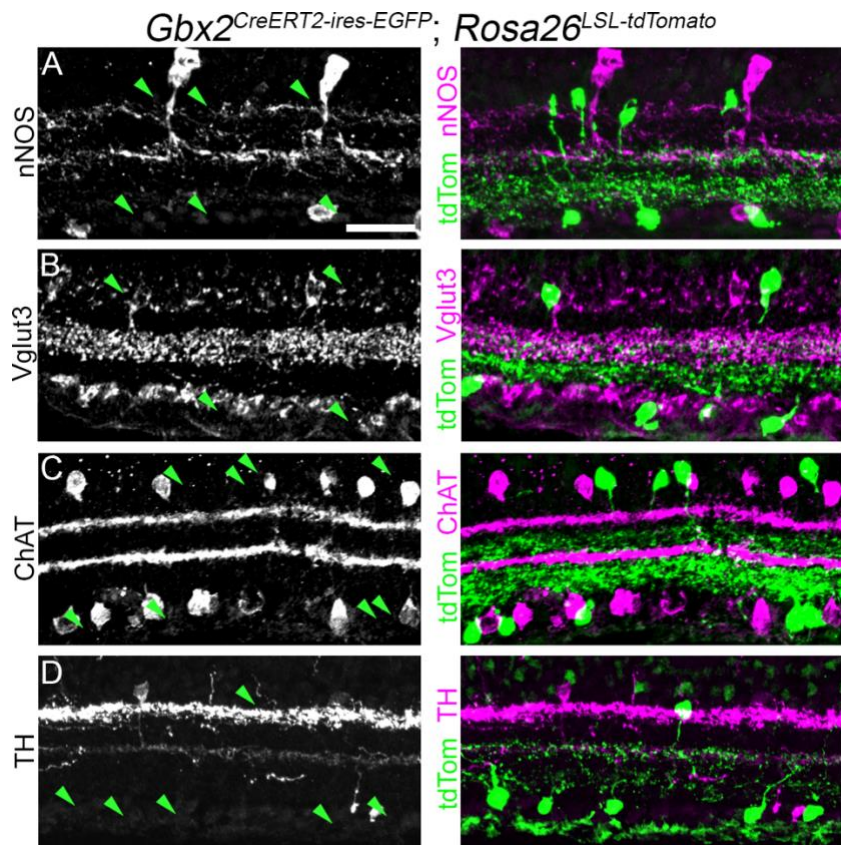

**Figure S5. *Gbx2*+ ACs do not colocalize with many canonical neurotransmitter cell markers. Related to Figures 2 and 3.**

Cross-sections of an adult retina from a *Gbx2*<sup>CreERT2-IRES-EGFP</sup>; *Rosa26*<sup>LSL-tdTomato</sup> mouse labeling the total *Gbx2*+ AC population (high-TM, 2.0mg tamoxifen). Left: Left, retinal sections from a *Gbx2*<sup>CreERT2-IRES-EGFP</sup>; *Rosa26*<sup>LSL-tdTomato</sup> mouse immunolabeled with (A) neuronal nitric oxide synthase (nNOS), (B) vesicular glutamate transporter 3 (Vglut3), (C) choline acetyl transferase transporter (ChAT), and (D) tyrosine hydroxylase (TH). Right: Merged images of *Gbx2*+ ACs (green) and the neurotransmitter marker (magenta). Arrows denote colocalization between the cell marker and *Gbx2*+ ACs, and arrowheads denote *Gbx2*+ ACs that do not colocalize with the specific cell marker. Scale bar, 25 μm.

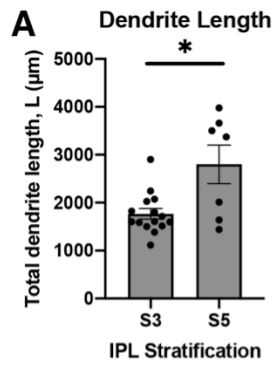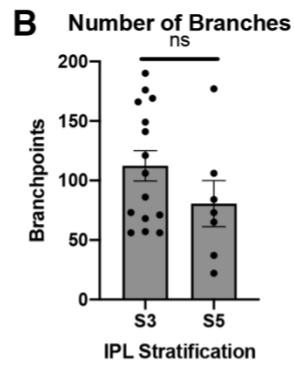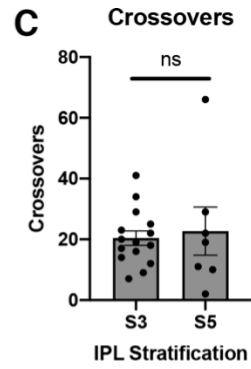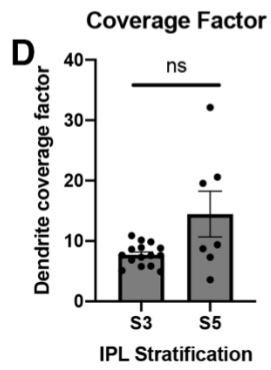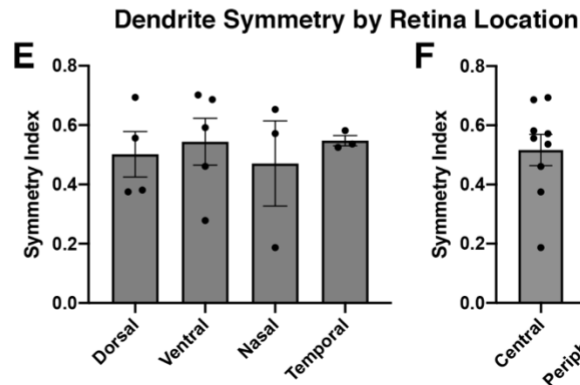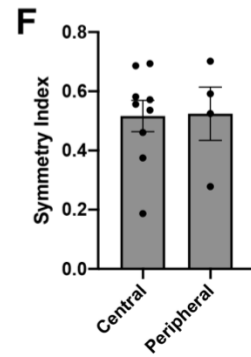

**Dendrite Orientation by Retina Location**

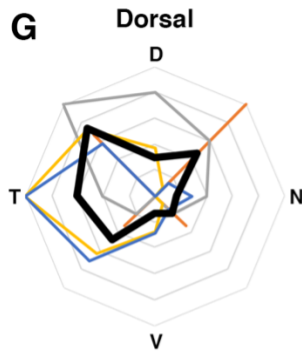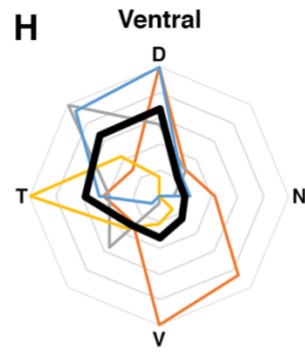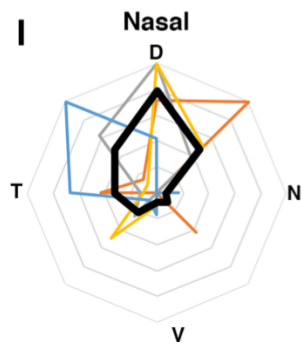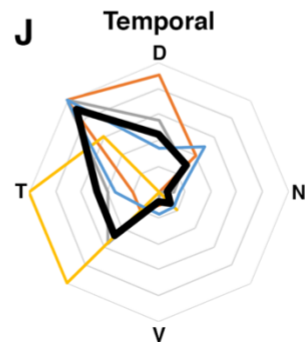



**Figure S6. Dendritic morphology and orientation of Gbx2+ ACs by retina location. Related to Figure 4.**

**(A-C)** S3- and S5-Gbx2+ AC morphology in **(A)** total dendrite length, **(B)** number of branches, **(C)** dendrite branch self-crossover. n=15, 7 cells for S3 and S5 respectively. **(D, E)** S3-stratifying Gbx2+ ACs show a similar dendrite asymmetry in **(D)** each retinal quadrant (n=3-5 retinas per quadrant) and **(E)** between central and peripheral retina (n=4, 9 retinas respectively). **(F-I)** A polar plot of dendrite orientation of S3-targeting Gbx2+ ACs in each retinal quadrant; black trace represents the mean and colored traces represent neurons quantified from a single retina (n >20 neurons per retina, n= 4 retinas). D, dorsal; V, ventral; N, nasal; T, temporal. Data represented as mean  $\pm$  SEM. \*p<0.05 by an unpaired t-test with a Welch's correction.
